RESEARCH ARTICLE

# Predicting $VO_{2peak}$ from Submaximal- and Peak Exercise Models: The HUNT 3 Fitness Study, Norway

Henrik Loe<sup>1,2</sup>, Bjarne M. Nes<sup>1</sup>, Ulrik Wisløff<sup>1\*</sup>

**1** K.G. Jebsen Center of Exercise in Medicine at Department of Circulation and Medical Imaging, Norwegian University of Science and Technology, Trondheim, Norway, **2** Valnesfjord Rehabilitation Center, Valnesfjord, Norway

\* [Ulrik.wisloff@ntnu.no](mailto:Ulrik.wisloff@ntnu.no)

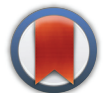

CrossMark  
click for updates

OPEN ACCESS

**Citation:** Loe H, Nes BM, Wisløff U (2016) Predicting  $VO_{2peak}$  from Submaximal- and Peak Exercise Models: The HUNT 3 Fitness Study, Norway. PLoS ONE 11(1): e0144873. doi:10.1371/journal.pone.0144873

**Editor:** Maria Francesca Piacentini, University of Rome, ITALY

**Received:** May 7, 2015

**Accepted:** November 24, 2015

**Published:** January 21, 2016

**Copyright:** © 2016 Loe et al. This is an open access article distributed under the terms of the [Creative Commons Attribution License](https://creativecommons.org/licenses/by/4.0/), which permits unrestricted use, distribution, and reproduction in any medium, provided the original author and source are credited.

**Data Availability Statement:** Due to ethical restrictions involving patient consent, third party data used from the HUNT Study in research projects will when reasonably requested by others be made available on request to the HUNT Data Access Committee ([hunt@medisin.ntnu.no](mailto:hunt@medisin.ntnu.no)). The HUNT data access information (available here: <http://www.ntnu.edu/hunt/data>) describes in detail the policy regarding data availability.

**Funding:** This study was funded by K.G. Jebsen Foundation, The Norwegian Council on cardiovascular Disease, The Research Council of Norway, Foundation for Cardiovascular Research at

## Abstract

### Purpose

Peak oxygen uptake ( $VO_{2peak}$ ) is seldom assessed in health care settings although being inversely linked to cardiovascular risk and all-cause mortality. The aim of this study was to develop  $VO_{2peak}$  prediction models for men and women based on directly measured  $VO_{2peak}$  from a large healthy population

### Methods

$VO_{2peak}$  prediction models based on submaximal- and peak performance treadmill work were derived from multiple regression analysis. 4637 healthy men and women aged 20–90 years were included. Data splitting was used to generate validation and cross-validation samples.

### Results

The accuracy for the peak performance models were 10.5% (SEE = 4.63 mL·kg<sup>-1</sup>·min<sup>-1</sup>) and 11.5% (SEE = 4.11 mL·kg<sup>-1</sup>·min<sup>-1</sup>) for men and women, respectively, with 75% and 72% of the variance explained. For the submaximal performance models accuracy were 14.1% (SEE = 6.24 mL·kg<sup>-1</sup>·min<sup>-1</sup>) and 14.4% (SEE = 5.17 mL·kg<sup>-1</sup>·min<sup>-1</sup>) for men and women, respectively, with 55% and 56% of the variance explained. The validation and cross-validation samples displayed SEE and variance explained in agreement with the total sample. Cross-classification between measured and predicted  $VO_{2peak}$  accurately classified 91% of the participants within the correct or nearest quintile of measured  $VO_{2peak}$ .

### Conclusion

Judicious use of the exercise prediction models presented in this study offers valuable information in providing a fairly accurate assessment of  $VO_{2peak}$ , which may be beneficial for risk stratification in health care settings.

St. Olav's Hospital, Norwegian State Railways, Roche Norway Incorporated and Valnesfjord Rehabilitation Center. The funders had no role in study design, data collection and analysis, decision to publish, or preparation of the manuscript.

**Competing Interests:** This study was funded by in part Roche Norway Incorporated Center. There are no disclosures to report or any conflicts of interest. This does not alter the authors' adherence to all the PLOS ONE policies on sharing data and materials.

## Introduction

Peak oxygen uptake (VO<sub>2peak</sub>) is widely referred to as cardiorespiratory fitness (CRF) [1], and is inversely linked to cardiovascular disease, hypertension, certain cancers, metabolic syndrome [2,3], and all-cause mortality [4]. At present there is no consensus identifying a precise threshold of cardiorespiratory fitness to be associated with increased cardiovascular risks. However, values below 8 METs and 6 METs in healthy men and women, respectively, are linked with higher all-cause mortality and adverse cardiovascular effects [4]. Additionally, data suggest that MET levels > 9 and > 7 (vs. lower MET levels) among men and women, respectively, is associated with a mortality risk reduction of  $\geq 50\%$  over an average 8 years follow-up [5]. Despite being an essential health indicator, VO<sub>2peak</sub> is rarely assessed in health care settings [5,6], likely because direct gas analysis measurements of VO<sub>2peak</sub> is expensive, necessitate the use of advanced equipment, and trained personnel [2]. However, reliable and valid prediction models should be considered as several studies have shown that either directly measured or estimated VO<sub>2peak</sub> enhance CVD-mortality prediction beyond traditional risk factors [7,8].

Although a maximal test is considered a safe practice, complications and adverse effects occur, normally linked to underlying disease [9]. Consequently, health care personnel should monitor when testing individuals at high risk.

There exist several VO<sub>2peak</sub> prediction models in the literature. Common limitations in these models are the use of uniform age samples [10–12], only one-gender represented [13–17], as well as models being based on subjects with homogenous cardiorespiratory fitness levels [10,12,13,15,18]. Hence, they yield fair VO<sub>2peak</sub> predictions only in subjects similar to those used in generating the model [2,19].

Therefore, the aim of the present study was to develop VO<sub>2peak</sub> prediction models from both submaximal- and peak treadmill performance, on the basis of data from a large healthy population of both men and women 20–90 years, with a great diversity in measured VO<sub>2peak</sub>. If these models show fair predictive accuracy they will provide a safe and feasible method for estimating VO<sub>2peak</sub> for a wide variety of people.

## Methods

### Study sample

In 2006–2008, the total population above 20 years of age in Nord-Trøndelag county, in Norway, were invited to the third wave of the HUNT study (HUNT 3). Out of a total population of 94194, 54% accepted the invitation (n = 50821). A sub-study (The HUNT Fitness Study) invited healthy subjects (without cardiovascular disease, cancer, pulmonary disease and use of blood pressure medication) in three pre-selected municipalities within the county, to perform treadmill testing with direct measurement of maximal oxygen uptake (VO<sub>2max</sub>). Out of 12609 potential eligible participants, 5633 appeared, and 1003 failed to complete the cardiopulmonary exercise test (CPET), withdrew or were excluded for medical reasons detected during medical interview. 4637 participants completed the exercise testing.

### Ethics statement

The study was approved by REK- Regional Committees for Medical and Health Research Ethics (2013/1788/REK nord), the Norwegian Data Inspectorate and the National Directorate of Health. The study was conducted in conformity with the Declaration of Helsinki and all participants signed a document of informed consent.

## Exercise test procedures

A 10-minute warm-up was implemented with workload individualized to induce some sweat, moderately augmented heart rate and breathing, but devoid of exhaustion. Subsequent the warm-up subjects entered the treadmill used for testing (DK7830; DK City, Taichung, Taiwan) and were equipped with a heart rate monitor (Polar S610 or RS400; Polar, Kempele, Finland) and face mask (Hans Rudolph; Shawnee, KS). Subjects were instructed to avoid handrail grasp. Cardiorespiratory variables were measured continuously using ergospirometry (MetaMax II; Cortex Biophysik GmbH, Leipzig, Germany) connected to computer software (Cortex MetaSoft, version 1.11.5). A graded individualized treadmill protocol, starting with the warm-up workload, was used with subjects walking or running at gradually increased speed and/or inclination. Treadmill speed was increased (0.5–1.0 km·h<sup>-1</sup>) when VO<sub>2</sub> uptake measurements remained stable > 30 s, keeping a fixed inclination if possible. Test was terminated when subject reached volitional exhaustion (e.g. leg fatigue and shortness of breath), preferably within 8–12 minutes (Table 1). VO<sub>2max</sub> was taken as the mean of the three successive highest 10-s VO<sub>2</sub> values and defined by a leveling off of VO<sub>2</sub> (<2 mL·kg<sup>-1</sup>·min<sup>-1</sup> change over the span of these successive measurements) despite increasing speed and/or inclination, in combination with a respiratory exchange ratio (R) above 1.05 and subjective volitional exhaustion (e.g. leg fatigue and shortness of breath). Since a total of 17.6% of the subjects failed to reach all the criteria, the term VO<sub>2peak</sub> was used. During the incremental test most subjects had their steady-state VO<sub>2</sub> measured at one (n = 2827) or two (n = 2576) submaximal levels. At the first submaximal level (VO<sub>2</sub> < ventilatory anaerobic threshold (established by V-slope)) steady-state VO<sub>2</sub> was attained from each subject after 3 minutes. Measurements at this level were used to develop the submaximal models. At each level, as well as at peak performance, treadmill- velocity and inclination in addition to heart rate were also registered. Velocities in the range 5.9–8.0 km·h<sup>-1</sup> typically represents the transition from walking to running, with individual variation attributed differences in e.g. stride length, leg length and body-size [20–22]. Test velocities used in development of the VO<sub>2peak</sub> prediction models suggest that most participants (92%) walked during the first submaximal measurement, whereas approximately 80% were running during peak measurements. An average of 87% of all participants used 10% treadmill inclination during both the first submaximal and the peak measurements. For development of the submaximal performance models peak heart rates (HR<sub>peak</sub>) were predicted from age in two gender specific linear regression models based on the HUNT 3 fitness data (men: HR<sub>peak</sub> = 215.336–0.73 x age,

**Table 1. Test protocol for using the VO<sub>2peak</sub> prediction models derived from treadmill work.**

| Submaximal performance model*                                                                                                                                                                    | Peak performance model**                                                                                                                                                                                                                  |
|--------------------------------------------------------------------------------------------------------------------------------------------------------------------------------------------------|-------------------------------------------------------------------------------------------------------------------------------------------------------------------------------------------------------------------------------------------|
| 1. Warm-up: 10-minutes with individualized workload that induces some sweat, moderately increased heart rate and breathing, but devoid of exhaustion. Do not grab handrails if not necessary***. |                                                                                                                                                                                                                                           |
| 2. Continue for 3 minutes on the established warm-up workload                                                                                                                                    | Use warm-up settings (velocity and inclination) as initial workload for the 3 first minutes. Then increase velocity (0.5–1.0 km·h <sup>-1</sup> ) or inclination*** approximately every minute. (Anticipated test duration: 8–12 minutes) |
| 3. Record HR <sub>submax</sub> , velocity and inclination after 3 minutes and use for prediction                                                                                                 | Record velocity and inclination subsequent last workload endured > 30 seconds and use for prediction                                                                                                                                      |
| 4.                                                                                                                                                                                               | Walk for 5 minutes at a low workload to reduce heart rate and allow removal of accumulated lactate.                                                                                                                                       |

\*Approximately 92% walked during the submaximal measurements

\*\*Approximately 80% ran during peak measurements; anticipated test duration 8–12 minutes

\*\*\*87% used 10% inclination as fixed slope angle during both submaximal and peak tests

doi:10.1371/journal.pone.0144873.t001

$R^2 = 0.40$ ,  $SEE = 12.25$  and women:  $HR_{peak} = 212.497 - 0.702 \times \text{age}$ ,  $R^2 = 0.40$ ,  $SEE = 11.71$ ) and integrated into the fraction peak heart rate variable (Fraction peakHR:  $HR_{submax}/215.336 - 0.73 \times \text{age}$  (men);  $HR_{submax}/212.497 - 0.702 \times \text{age}$  (women)). All tests were performed by trained personnel and test equipment were routinely calibrated with volume ventilation calibrated every third test and gas calibrated every fifth test. Height was measured in centimeters with one decimal, and weight in kilograms with one decimal by internally standardized procedures.

## Statistical analysis

Descriptive statistics are given as mean and standard deviation for men and women, respectively. Potential variables were chosen on the basis of correlation with measured VO<sub>2peak</sub> in previous literature, and entered subsequently in a hierarchical linear regression model. All the retained variables (Treadmill inclination and velocity, weight, age and Fraction HR<sub>peak</sub>) made a considerable influence on total model fit. The models were checked for normality and homoscedasticity of residuals and these assumptions were satisfied. All models presented in this paper were derived from the total sample. Internal cross-validation was checked by data-splitting procedures, i.e. SPSS randomly selected approximately 50% of all cases, here denoted validation sample, with the remaining cases denoted cross-validation sample. In these subsets linear regression analysis were performed on the validation sample and applied to predict VO<sub>2peak</sub> in both the validation- and the cross-validation samples. Model fit was evaluated by squared multiple regression coefficients ( $R^2$ ) and standard errors of the estimate (SEE).  $R^2$  and  $R^2$  adjusted increased similarly for each new independent variable added to the models.  $R^2$  and  $R^2$  adjusted were either identical or differed in the third decimal place, showing that both had almost identical impact on the outcome variable. As a result  $R^2$  was chosen throughout this paper. To be able to compare the model precision to models derived from external samples we also calculated the % SEE which refers to the percentage of the measured mean VO<sub>2peak</sub> within which the estimates generally fall. In the total sample, as well as subgroups of age, VO<sub>2peak</sub> and treadmill velocity, we calculated constant error (CE) and total error (TE) for the model. CE represents the mean difference between measured and predicted values ( $\sum (\text{measured-predicted})/n$ ), while TE represents the squared mean differences ( $\sqrt{\sum (\text{measured-predicted})^2/n}$ ). Pearson correlation and variance explained between measured and predicted VO<sub>2peak</sub> were used to examine potential shrinkage between validation and cross-validation samples. Further internal validation was done by cross-classifying subjects into quintiles of measured and predicted VO<sub>2peak</sub>. Measures of rank correlation and agreement were tested by use of Kendall's Tau and Cohens' Kappa statistics. Two-sided Paired Samples T-test was used to establish differences between measured and predicted VO<sub>2peak</sub>. Statistical analyses were performed with SPSS 20.0 (Statistical package for social sciences, Chicago, IL, USA).

## Results

Descriptive characteristics are presented in [Table 2](#). Descriptive data in the validation and cross-validation samples were equally distributed ([Table 3](#)). Additional descriptive data of the HUNT 3 fitness population are displayed in a previous study [[23](#)].

### Predicting VO<sub>2peak</sub> from peak treadmill performance

Peak treadmill inclination and velocity accounted for most of the variance explained by the VO<sub>2peak</sub> prediction model (men:  $R^2 = 0.72$ ,  $p < 0.001$ ; women:  $R^2 = 0.68$ ,  $p < 0.001$ ), with velocity being the paramount factor. Modest influence were seen from weight and age, and the total explained variance for the peak performance prediction model was  $R^2 = 0.75$  ( $p < 0.001$ ) in men and  $R^2 = 0.72$  ( $p < 0.001$ ) in women. Including resting heart rate and peak heart rate into

**Table 2. Descriptive data: The HUNT 3 fitness study.**

|                                                               | All<br>(n = 4637) | Men<br>(n = 2266) | Women<br>(n = 2371) |
|---------------------------------------------------------------|-------------------|-------------------|---------------------|
| Age (yr.)                                                     | 49 ± 14           | 50 ± 14           | 49 ± 14             |
| <b>Physical data</b>                                          |                   |                   |                     |
| Height (cm)                                                   | 172.0 ± 9.1       | 179.2 ± 6.5       | 165.7 ± 6.0         |
| Weight (kg)                                                   | 77.4 ± 13.9       | 85.6 ± 11.6       | 70.1 ± 11.6         |
| <b>Physiological data</b>                                     |                   |                   |                     |
| VO <sub>2peak</sub> (L·min <sup>-1</sup> )                    | 3.10 ± 0.91       | 3.75 ± 0.76       | 2.47 ± 0.50         |
| VO <sub>2peak</sub> (mL·kg <sup>-1</sup> ·min <sup>-1</sup> ) | 40.0 ± 9.5        | 44.3 ± 9.3        | 35.9 ± 7.8          |
| R (VCO <sub>2</sub> ·VO <sub>2</sub> <sup>-1</sup> )          | 1.12 ± 0.07       | 1.13 ± 0.07       | 1.12 ± 0.07         |
| HR <sub>peak</sub> (beats·min <sup>-1</sup> )                 | 179 ± 15          | 180 ± 16          | 179 ± 15            |
| RHR (beats·min <sup>-1</sup> )                                | 59 ± 10           | 58 ± 9            | 61 ± 10             |

Data are presented as arithmetic mean ± SD. VO<sub>2peak</sub>: peak oxygen uptake; HR<sub>peak</sub>: peak heart rate; RHR: resting heart rate.

doi:10.1371/journal.pone.0144873.t002

the model did not contribute considerable changes in R<sup>2</sup> and SEE and were thus excluded from the models. A strong correlation was demonstrated between the predicted- and measured VO<sub>2peak</sub> (men: r = 0.87; women: r = 0.85) (Fig 1). Two gender specific VO<sub>2peak</sub> prediction equations were derived from multiple linear regression using the total sample, male: VO<sub>2peak</sub> = 24.24 + (0.599 x treadmill inclination in %) + (3.197 x treadmill velocity in km·h<sup>-1</sup>) - (0.122 x body weight in kilos) - (0.126 x age in years); women: VO<sub>2peak</sub> = 17.21 + (0.582 x treadmill inclination in percent) + (3.317 x treadmill velocity in km·h<sup>-1</sup>) - (0.116 x weight in kilos) - (0.099 x age in years) (Tables 4, 5 and 6).

### Cross-validation of the peak performance prediction model

The Coefficient of determination (R<sup>2</sup>) remained stable between the total sample (0.75 and 0.72) and the validation sample (0.76 and 0.72) among both men and women, respectively (Tables 5 and 7), thus suggesting an internally robust prediction model. Also, there were non-significant differences between measured and predicted VO<sub>2peak</sub>, and we display CE values close to zero,

**Table 3. Descriptive data for the male and female validation and cross-validation sample: The HUNT 3 fitness study.**

|                                                               | Validation sample |                     | Cross-validation sample |                     |
|---------------------------------------------------------------|-------------------|---------------------|-------------------------|---------------------|
|                                                               | Men<br>(n = 1105) | Women<br>(n = 1199) | Men<br>(n = 1161)       | Women<br>(n = 1172) |
| Age (yr.)                                                     | 50 ± 14           | 49 ± 14             | 50 ± 14                 | 49 ± 14             |
| <b>Physical data</b>                                          |                   |                     |                         |                     |
| Height (cm)                                                   | 179.1 ± 6.5       | 165.6 ± 6.1         | 179.2 ± 6.5             | 165.8 ± 5.9         |
| Weight (kg)                                                   | 85.4 ± 11.7       | 69.8 ± 11.1         | 85.7 ± 11.5             | 70.5 ± 12.0         |
| <b>Physiological data</b>                                     |                   |                     |                         |                     |
| VO <sub>2peak</sub> (L·min <sup>-1</sup> )                    | 3.75 ± 0.77       | 2.47 ± 0.51         | 3.75 ± 0.75             | 2.48 ± 0.50         |
| VO <sub>2peak</sub> (mL·kg <sup>-1</sup> ·min <sup>-1</sup> ) | 44.4 ± 9.3        | 36.0 ± 7.9          | 44.3 ± 9.2              | 35.9 ± 7.6          |
| R (VCO <sub>2</sub> ·VO <sub>2</sub> <sup>-1</sup> )          | 1.13 ± 0.07       | 1.12 ± 0.08         | 1.13 ± 0.07             | 1.12 ± 0.07         |
| HR <sub>peak</sub> (beats·min <sup>-1</sup> )                 | 180 ± 16          | 178 ± 15            | 180 ± 16                | 180 ± 15            |
| RHR (beats·min <sup>-1</sup> )                                | 58 ± 9            | 61 ± 10             | 58 ± 10                 | 61 ± 10             |

Data are presented as arithmetic mean ± SD. VO<sub>2peak</sub>: peak oxygen uptake; HR<sub>peak</sub>: peak heart rate; RHR: resting heart rate.

doi:10.1371/journal.pone.0144873.t003

MEN

WOMEN

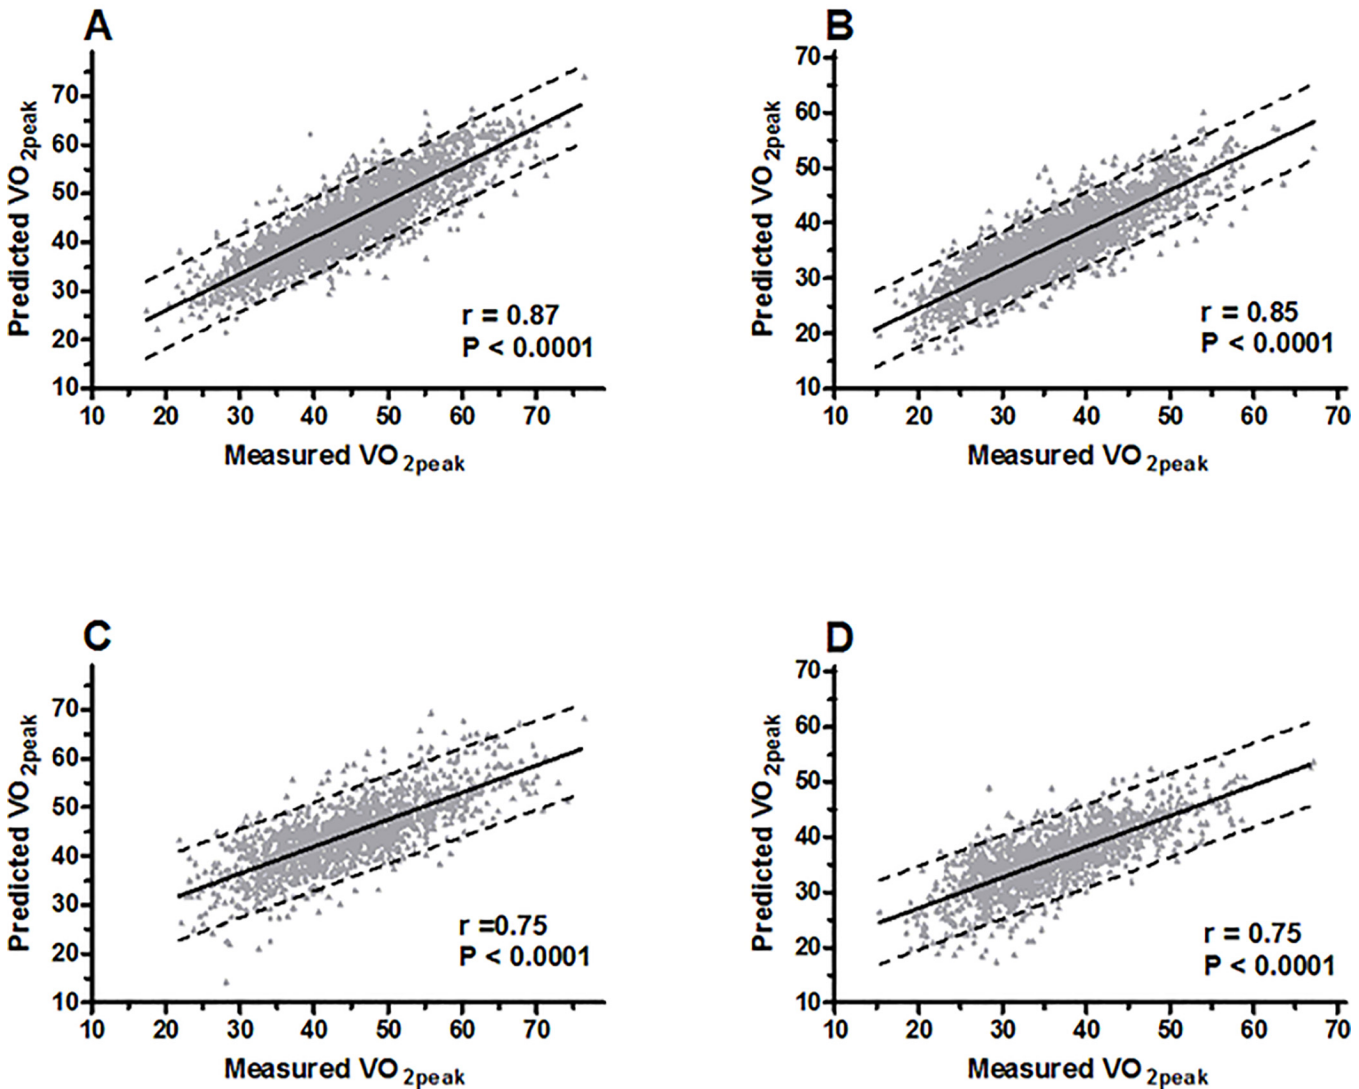

**Fig 1. Correlation plots between measured and predicted VO<sub>2peak</sub> with 95% prediction bands from peak treadmill performance (A and B), and submaximal treadmill performance (C and D).**

doi:10.1371/journal.pone.0144873.g001

in the total sample (– 0.03 and 0.02), validation sample (– 0.03 and – 0.03) and cross-validation sample (– 0.21 and – 0.04) in both men and women, respectively (Tables 8–10), signifying a valid prediction of the mean VO<sub>2peak</sub> without systematical over- or under prediction, respectively. Our prediction models continue to be stable when stratified into subgroups of age and treadmill velocity (non-significant differences between measured and predicted VO<sub>2peak</sub>). However, when divided into VO<sub>2peak</sub> subgroups the least fit participants (<35 mL·kg<sup>-1</sup>·min<sup>-1</sup> for men and <30 mL·kg<sup>-1</sup>·min<sup>-1</sup> for women) tended to be overestimated (men: p<0.001; women: p<0.001), and the most fit participants (>50 mL·kg<sup>-1</sup>·min<sup>-1</sup> for men and >40 mL·kg<sup>-1</sup>·min<sup>-1</sup> for women) tended to be underestimated (men: p<0.001; women: p<0.001).

**Table 4. Multiple linear regression coefficients for predicting VO<sub>2peak</sub> (mL·kg<sup>-1</sup>·min<sup>-1</sup>) from peak measurements in total sample.**

|                | Men    |                |                     | Women  |                |                     |
|----------------|--------|----------------|---------------------|--------|----------------|---------------------|
|                | β      | Standardized β | Pearson Correlation | β      | Standardized β | Pearson Correlation |
| Intercept      | 24.24  |                |                     | 17.21  |                |                     |
| Inclination    | 0.599  | 0.084          | -0.260              | 0.582  | 0.130          | -0.286              |
| Velocity       | 3.197  | 0.729          | 0.842               | 3.317  | 0.717          | 0.818               |
| Weight         | -0.122 | -0.152         | -0.346              | -0.116 | -0.168         | -0.410              |
| Age            | -0.126 | -0.185         | -0.572              | -0.099 | -0.175         | -0.574              |
| R              | 0.866  |                |                     | 0.848  |                |                     |
| R <sup>2</sup> | 0.750  |                |                     | 0.719  |                |                     |
| SEE            | 4.63   |                |                     | 4.11   |                |                     |

R: multiple regression coefficient; R<sup>2</sup>: coefficient of determination; SEE: standard error of estimate, Inclination (%), Velocity (km·h<sup>-1</sup>), Weight (kg), Age (yr.).

doi:10.1371/journal.pone.0144873.t004

This is in agreement with the validation and cross-validation samples. The least fit men and women showed CE values of -3.50 and -2.60 vs. most fit 2.73 and 2.81, respectively, with corresponding TE values of 5.01 and 4.35 vs. 5.27 and 4.80, with similar tendencies in validation and cross-validation samples. In the medium fit participants (VO<sub>2peak</sub> between 35 and 50 mL·kg<sup>-1</sup>·min<sup>-1</sup> for men and between 30 and 40 mL·kg<sup>-1</sup>·min<sup>-1</sup> for women) the model appears to predict VO<sub>2peak</sub> fairly well (men: p<0.05; women: p<0.001), with CE values in men and women of -0.28 and -0.37, respectively. The same tendencies are shown in the validation and cross-validation samples (Tables 8–10). Pearson correlation showed minimal shrinkage between validation- sample (men: r = 0.870, R<sup>2</sup> = 0.757, p < 0.01; women: r = 0.846, R<sup>2</sup> = 0.716, p < 0.01) and cross-validation sample (men: r = 0.863, R<sup>2</sup> = 0.745, p = 0.01; women: r = 0.850, R<sup>2</sup> = 0.723, p < 0.01). Thus, the entire sample was used in development of the models.

### Cross-classification of participants in the peak performance prediction model

The models managed to categorize participants fairly accurately into the correct measured VO<sub>2peak</sub> group when cross-classifying participants into quintiles of measured and predicted VO<sub>2peak</sub> (Table 11). In total, 75.3% and 77.6% of the men and women, predicted to be in the lowest quintile, were classified correctly into the lowest measured quintile, respectively, while 95.4% and 96.7% were correctly classified within the correct or closest measured quintile.

**Table 5. Multiple linear regression analysis for predicting VO<sub>2peak</sub> (mL·kg<sup>-1</sup>·min<sup>-1</sup>) from peak measurements in total sample: The HUNT 3 fitness study.**

|                                    | Men  |                |                 |        |      |      | Women |                |                 |        |      |      |
|------------------------------------|------|----------------|-----------------|--------|------|------|-------|----------------|-----------------|--------|------|------|
|                                    | R    | R <sup>2</sup> | ΔR <sup>2</sup> | p      | SEE  | %SEE | R     | R <sup>2</sup> | ΔR <sup>2</sup> | p      | SEE  | %SEE |
| Inclination                        | 0.26 | 0.07           | —               | —      | 8.94 | 20.2 | 0.29  | 0.08           | —               | —      | 7.43 | 20.7 |
| Inclination, Velocity              | 0.85 | 0.72           | 0.65            | <0.001 | 4.94 | 11.2 | 0.83  | 0.68           | 0.60            | <0.001 | 4.38 | 12.2 |
| Inclination, Velocity, Weight      | 0.85 | 0.73           | 0.01            | <0.001 | 4.83 | 10.9 | 0.84  | 0.70           | 0.02            | <0.001 | 4.25 | 11.8 |
| Inclination, Velocity, Weight, Age | 0.87 | 0.75           | 0.02            | <0.001 | 4.63 | 10.5 | 0.85  | 0.72           | 0.02            | <0.001 | 4.11 | 11.5 |

R: multiple regression coefficient; R<sup>2</sup>: coefficient of determination; SEE: standard error of estimate; p: level of significance, Inclination (%), Velocity (km·h<sup>-1</sup>), Weight (kg), Age (yr.).

doi:10.1371/journal.pone.0144873.t005

**Table 6. VO<sub>2peak</sub> prediction models based on peak (P) and submaximal (S) treadmill performance in men and women.**

| Equations                                                                                                                                   | Velocity (Range)     | Inclination (Range) | R <sup>2</sup> | SEE (%) |
|---------------------------------------------------------------------------------------------------------------------------------------------|----------------------|---------------------|----------------|---------|
| <b>Men</b>                                                                                                                                  |                      |                     |                |         |
| VO <sub>2peak</sub> (P) = 24.24 + (0.599 x inclination) + (3.197 x velocity)–(0.122 x weight)–(0.126 x age)                                 | 9.6 ± 2.1 (3.5–17.0) | 10.3 ± 1.3 (0–15)   | 0.75           | 10.5    |
| VO <sub>2peak</sub> (S) = 35.25 + (1.276 x inclination) + (6.402 x velocity)–(0.196 x weight)–(27.615 x test heart rate/215.336–0.73 x age) | 5.6 ± 1.0 (2.5–12.0) | 9.7 ± 1.3 (0–10)    | 0.55           | 14.1    |
| <b>Women</b>                                                                                                                                |                      |                     |                |         |
| VO <sub>2peak</sub> (P) = 17.21 + (0.582 x inclination) + (3.317 x velocity)–(0.116 x weight)–(0.099 x age)                                 | 7.6 ± 1.7 (2.5–14.0) | 10.7 ± 1.7 (0–16)   | 0.72           | 11.5    |
| VO <sub>2peak</sub> (S) = 23.77 + (1.205 x inclination) + (6.051 x velocity)–(0.16 x weight)–(20.671 x test heart rate/212.497–0.702 x age) | 5.0 ± 0.8 (2.0–8.0)  | 9.3 ± 1.8 (0–15)    | 0.56           | 14.4    |

VO<sub>2peak</sub>: peak oxygen uptake, velocity (km·h<sup>-1</sup>) and inclination (%) are presented as arithmetic mean ± SD, Range (minimum-maximum), age (yr.), weight (kg), R<sup>2</sup>: coefficient of determination, SEE: standard error of estimate.

doi:10.1371/journal.pone.0144873.t006

77.4% and 78.0% of the men and women, predicted to be in the highest quintile, were correctly classified into the highest measured quintile, respectively, with 95.8% and 95.9% being classified correctly into one of the two highest quintiles (Table 11). The rank correlation between measured and predicted quintiles were 0.74 and 0.70 in men and women, respectively, while measure of agreement by Kappa statistic was 0.45 in men and 0.41 in women.

### Predicting VO<sub>2peak</sub> from submaximal treadmill performance

Treadmill inclination and velocity accounted for the major part of the explained variance in predicting VO<sub>2peak</sub> (men: R<sup>2</sup> = 0.40, p<0.001; women: R<sup>2</sup> = 0.43, p<0.001), with velocity being the most important variable (men: R<sup>2</sup> = 0.35, p<0.001; women: R<sup>2</sup> = 0.34, p<0.001). Weight (men: R<sup>2</sup> = 0.06, p<0.001; women: R<sup>2</sup> = 0.06, p<0.001) and fraction peakHR (HR<sub>submax</sub> and age, men: R<sup>2</sup> = 0.09, p<0.001; women: R<sup>2</sup> = 0.06, p<0.001) accounted for a lesser but considerable part of the total variance (men: R<sup>2</sup> = 0.55, p<0.001; women: R<sup>2</sup> = 0.56, p<0.001). Resting heart rate yielded negligible changes in R<sup>2</sup> and SEE and hence excluded from the prediction model. A high correlation (r = 0.75) was observed between predicted- and measured VO<sub>2peak</sub> among men and women (Fig 1). The final regression models derived from total sample were 35.25 + (1.276 x treadmill inclination in %) + (6.402 x velocity in km·h<sup>-1</sup>)–(0.196 x weight in kilos)–(27.615 x HR<sub>submax</sub>/215.336–0.73 x age in years) for men and 23.77 + (1.205 x treadmill inclination in %) + (6.051 x velocity in km·h<sup>-1</sup>)–(0.160 x weight in kilos)–(20.671 x HR<sub>submax</sub>/212.497–0.702 x age in years) for women (Tables 6, 12 and 13).

**Table 7. Multiple linear regression analysis for predicting VO<sub>2peak</sub> (mL·kg<sup>-1</sup>·min<sup>-1</sup>) from peak measurements in men and women, validation samples: The HUNT 3 fitness study.**

|                                    | Validation sample men |                |                 |        |      |      | Validation sample women |                |                 |        |      |      |
|------------------------------------|-----------------------|----------------|-----------------|--------|------|------|-------------------------|----------------|-----------------|--------|------|------|
|                                    | R                     | R <sup>2</sup> | ΔR <sup>2</sup> | p      | SEE  | %SEE | R                       | R <sup>2</sup> | ΔR <sup>2</sup> | p      | SEE  | %SEE |
| Inclination                        | 0.23                  | 0.05           | —               | —      | 9.09 | 20.5 | 0.26                    | 0.07           | —               | —      | 7.62 | 21.2 |
| Inclination, Velocity              | 0.85                  | 0.73           | 0.68            | <0.001 | 4.88 | 11.0 | 0.83                    | 0.68           | 0.62            | <0.001 | 4.45 | 12.4 |
| Inclination, Velocity, Weight      | 0.86                  | 0.74           | 0.01            | <0.001 | 4.78 | 10.8 | 0.84                    | 0.70           | 0.02            | <0.001 | 4.33 | 12.0 |
| Inclination, Velocity, Weight, Age | 0.87                  | 0.76           | 0.02            | <0.001 | 4.61 | 10.4 | 0.85                    | 0.72           | 0.02            | <0.001 | 4.21 | 11.7 |

R: multiple regression coefficient; R<sup>2</sup>: coefficient of determination; SEE: standard error of estimate; p: level of significance, Inclination (%), Velocity (km·h<sup>-1</sup>), Weight (kg), Age (yr.).

doi:10.1371/journal.pone.0144873.t007



**Table 8. Measured vs. Predicted VO<sub>2peak</sub>, from peak measurements, in the total sample: The HUNT 3 fitness study.**

|                           | Men                          |                               |       |       |      |             | Women                        |                               |       |       |      |             |
|---------------------------|------------------------------|-------------------------------|-------|-------|------|-------------|------------------------------|-------------------------------|-------|-------|------|-------------|
|                           | Measured VO <sub>2peak</sub> | Predicted VO <sub>2peak</sub> | CE    | % SEE | % TE | N (%)       | Measured VO <sub>2peak</sub> | Predicted VO <sub>2peak</sub> | CE    | % SEE | % TE | N (%)       |
| <b>Age (yr.)</b>          |                              |                               |       |       |      |             |                              |                               |       |       |      |             |
| <40                       | 50.9 ± 8.5                   | 51.1 ± 7.2                    | -0.25 | 9.0   | 9.0  | 550 (24.4)  | 41.0 ± 7.4                   | 41.1 ± 6.0                    | -0.09 | 10.5  | 10.5 | 664 (28.0)  |
| 40-60                     | 44.1 ± 8.1                   | 44.0 ± 6.6                    | 0.10  | 10.4  | 10.4 | 1231 (54.4) | 35.6 ± 6.8                   | 35.6 ± 5.2                    | 0.06  | 11.4  | 11.4 | 1249 (52.8) |
| >60                       | 37.3 ± 7.4                   | 37.4 ± 5.7                    | -0.09 | 12.6  | 12.6 | 479 (21.2)  | 29.4 ± 5.4                   | 29.4 ± 4.3                    | 0.06  | 13.0  | 13.4 | 455 (19.2)  |
| <b>VO<sub>2peak</sub></b> |                              |                               |       |       |      |             |                              |                               |       |       |      |             |
| <35(<30)                  | 31.2 ± 3.2                   | 34.7 ± 4.1                    | -3.50 | 8.6   | 16.1 | 388 (17.2)  | 26.4 ± 2.8                   | 29.0 ± 4.0                    | -2.60 | 8.9   | 16.5 | 547 (23.1)  |
| 35-50 (30-40)             | 42.8 ± 4.2                   | 43.0 ± 5.2                    | -0.28 | 7.7   | 9.7  | 1266 (56.0) | 34.9 ± 2.9                   | 35.2 ± 4.0                    | -0.37 | 7.0   | 10.1 | 1154 (48.7) |
| >50(>40)                  | 56.0 ± 5.0                   | 53.3 ± 5.6                    | 2.73  | 6.8   | 9.4  | 607 (26.8)  | 45.6 ± 4.8                   | 42.8 ± 5.0                    | 2.81  | 7.7   | 10.5 | 668 (28.2)  |
| <b>Velocity</b>           |                              |                               |       |       |      |             |                              |                               |       |       |      |             |
| <7                        | 31.9 ± 5.3                   | 32.1 ± 3.2                    | -0.17 | 13.1  | 13.1 | 209 (9.3)   | 29.3 ± 4.7                   | 29.2 ± 3.4                    | 0.15  | 12.4  | 12.5 | 757 (31.9)  |
| 7-10                      | 41.0 ± 6.2                   | 41.0 ± 4.0                    | 0.05  | 11.2  | 11.2 | 1260 (55.7) | 37.9 ± 5.9                   | 38.0 ± 3.9                    | -0.10 | 11.3  | 11.3 | 1459 (61.6) |
| >10                       | 52.9 ± 6.7                   | 53.0 ± 4.8                    | -0.11 | 9.1   | 9.1  | 792 (35.0)  | 50.1 ± 5.4                   | 49.6 ± 3.2                    | 0.47  | 8.9   | 8.9  | 153 (6.5)   |
| <b>Total</b>              | 44.3 ± 9.3                   | 44.3 ± 8.0                    | -0.03 | 10.5  | 10.5 | 2261        | 35.9 ± 7.8                   | 35.9 ± 6.6                    | 0.02  | 11.5  | 11.5 | 2369        |

VO<sub>2peak</sub> were categorized into 3 groups from measured VO<sub>2peak</sub>; <35, 35–50, >50 (mL kg<sup>-1</sup> min<sup>-1</sup>) and <30, 30–40, >40 (mL kg<sup>-1</sup> min<sup>-1</sup>) were cutoff values for men and women, respectively; velocity: treadmill velocity (km h<sup>-1</sup>).

doi:10.1371/journal.pone.0144873.t008

### Cross-validation of the submaximal performance prediction model

R<sup>2</sup> was stable between the total sample (0.55 and 0.56) and validation sample (0.54 and 0.56) in men and women, respectively (Tables 13 and 14), indicating a strong prediction model. Furthermore, there were non-significant differences between the measured and predicted VO<sub>2peak</sub>, and CE was close to zero in the total sample (– 0.14 and – 0.12), validation sample (– 0.27 and – 0.03) and cross-validation sample (– 0.09 and – 0.11), among both men and women, respectively (Tables 15–17), thus suggesting a valid estimation of mean VO<sub>2peak</sub>. The submaximal prediction models are less stable when stratified into subgroups of age, VO<sub>2peak</sub> and treadmill velocity groups. There was a tendency towards underestimating VO<sub>2peak</sub> (p<0.001 and p<0.001, with CE 3.03 and 1.46 among men and women, respectively, TE 6.78 and 5.63) in the youngest subjects (<40 years), with a subsequent overestimation (p<0.001 and p<0.001, with CE– 2.88 and– 1.70 among men and women, respectively, TE 6.42 and 4.86) in the oldest subjects (>60 years), whereas VO<sub>2peak</sub> was predicted fairly well (non-significant difference and p<0.01, with CE– 0.41 and– 0.58 among men and women, respectively, TE 5.90 and 5.02) in middle age group (40–60 years). In the VO<sub>2peak</sub> subgroups there was an apparent overestimation (p<0.001 and p<0.001, with CE– 5.82 and– 4.37 among men and women, respectively, TE 8.04 and 6.12) in the least fit groups (<35 mL·kg<sup>-1</sup>·min<sup>-1</sup> for men and <30 mL·kg<sup>-1</sup>·min<sup>-1</sup> for women), with a succeeding underestimation (p<0.001 and p<0.001, with CE 5.30 and 4.10 among men and women, respectively, TE 7.41 and 5.94) in the most fit group (>50 mL·kg<sup>-1</sup>·min<sup>-1</sup> for men and >40 mL·kg<sup>-1</sup>·min<sup>-1</sup> for women). However, the submaximal models

**Table 9. Cross-validation of Measured vs. Predicted VO<sub>2peak</sub>, from peak measurements, in men: The HUNT 3 fitness study.**

|                           | Validation sample            |                               |       |       |      |            | Cross-validation sample      |                               |       |       |      |            |
|---------------------------|------------------------------|-------------------------------|-------|-------|------|------------|------------------------------|-------------------------------|-------|-------|------|------------|
|                           | Measured VO <sub>2peak</sub> | Predicted VO <sub>2peak</sub> | CE    | % SEE | % TE | N (%)      | Measured VO <sub>2peak</sub> | Predicted VO <sub>2peak</sub> | CE    | % SEE | % TE | N (%)      |
| <b>Age (yr.)</b>          |                              |                               |       |       |      |            |                              |                               |       |       |      |            |
| <40                       | 50.9 ± 8.6                   | 51.2 ± 7.2                    | -0.34 | 8.6   | 8.6  | 274 (24.8) | 50.8 ± 8.4                   | 51.2 ± 7.8                    | -0.43 | 9.3   | 9.5  | 276 (23.8) |
| 40-60                     | 43.9 ± 8.0                   | 43.8 ± 6.6                    | 0.14  | 10.4  | 10.4 | 610 (55.4) | 44.3 ± 8.3                   | 44.5 ± 6.9                    | -0.17 | 10.5  | 10.5 | 621 (53.6) |
| >60                       | 37.4 ± 8.1                   | 37.5 ± 6.2                    | -0.07 | 13.2  | 13.2 | 218 (19.8) | 37.3 ± 6.8                   | 37.4 ± 5.7                    | -0.10 | 12.1  | 12.2 | 261 (22.6) |
| <b>VO<sub>2peak</sub></b> |                              |                               |       |       |      |            |                              |                               |       |       |      |            |
| <35                       | 31.0 ± 3.4                   | 34.5 ± 4.3                    | -3.54 | 8.5   | 16.0 | 189 (17.2) | 31.4 ± 3.0                   | 34.6 ± 4.1                    | -3.20 | 8.5   | 15.7 | 199 (17.2) |
| 35-50                     | 42.9 ± 4.3                   | 43.1 ± 5.2                    | -0.26 | 7.8   | 9.8  | 616 (55.8) | 42.7 ± 4.1                   | 43.1 ± 5.4                    | -0.40 | 7.6   | 10.1 | 650 (56.1) |
| >50                       | 56.0 ± 5.0                   | 53.3 ± 5.7                    | 2.70  | 6.5   | 9.2  | 297 (27.0) | 56.0 ± 5.0                   | 53.9 ± 5.7                    | 2.10  | 7.1   | 9.3  | 310 (26.7) |
| <b>Velocity</b>           |                              |                               |       |       |      |            |                              |                               |       |       |      |            |
| <7                        | 31.0 ± 5.8                   | 31.4 ± 3.5                    | -0.44 | 15.0  | 15.0 | 93 (8.4)   | 32.7 ± 4.8                   | 32.2 ± 3.0                    | 0.54  | 11.3  | 11.3 | 116 (10.0) |
| 7-10                      | 40.9 ± 6.2                   | 40.9 ± 4.0                    | 0.11  | 11.4  | 11.4 | 621 (56.4) | 41.0 ± 6.2                   | 41.0 ± 4.1                    | 0.04  | 11.0  | 11.0 | 639 (55.1) |
| >10                       | 53.0 ± 6.5                   | 53.1 ± 4.7                    | -0.14 | 8.4   | 8.4  | 388 (35.2) | 52.8 ± 7.0                   | 53.6 ± 5.0                    | -0.82 | 9.7   | 9.8  | 404 (34.9) |
| <b>Total</b>              | 44.4 ± 9.3                   | 44.4 ± 8.1                    | -0.03 | 10.4  | 10.4 | 1102       | 44.3 ± 9.2                   | 44.5 ± 8.3                    | -0.21 | 10.5  | 10.5 | 1159       |

VO<sub>2peak</sub> were categorized into 3 groups from measured VO<sub>2peak</sub>: <35, 35–50, >50 (mL kg<sup>-1</sup> min<sup>-1</sup>) were cutoff values for men; velocity: treadmill velocity (km h<sup>-1</sup>).

doi:10.1371/journal.pone.0144873.t009

predicted VO<sub>2peak</sub> fairly well (p<0.001 and p<0.001, with CE- 0.79 and- 0.53 among men and women, respectively, TE 4.83 and 4.07) in the medium fit subjects (VO<sub>2peak</sub> in the range of 35–50 mL·kg<sup>-1</sup>·min<sup>-1</sup> for men and between 30 and 40 mL·kg<sup>-1</sup>·min<sup>-1</sup> for women). All velocity groups predicted VO<sub>2peak</sub> fairly well, with no significant differences between measured and predicted VO<sub>2peak</sub> (<5 km·h<sup>-1</sup>: CE- 0.44 and- 0.49 among men and women, respectively, and TE 5.80 and 4.80; 5–6 km·h<sup>-1</sup>: CE- 0.35 and- 0.24, TE 6.24 and 5.28; > 6 km·h<sup>-1</sup>: CE- 0.36 and- 0.91, with TE 6.54 and 6.96). Findings in the total sample are in agreement with the overall tendencies in the validation and cross-validation samples (Tables 15–17). Pearson correlation showed minor shrinkage between validation- sample (men: r = 0.733, R<sup>2</sup> = 0.537, p < 0.01; women: r = 0.749, R<sup>2</sup> = 0.561, p < 0.01) and cross-validation sample (men: r = 0.755, R<sup>2</sup> = 0.570, p = 0.01; women: r = 0.743, R<sup>2</sup> = 0.552, p < 0.01). Hence, the entire sample was utilized in development of the models.

### Cross-classification of participants in the submaximal performance prediction model

Cross-classification of predicted (from submaximal performance) and measured VO<sub>2peak</sub> achieved a fairly accurate placing of subjects into the correct VO<sub>2peak</sub> quintile (Table 18). In total, 62.0% and 50.3% of the men and women were predicted appropriately into the lowest measured quintile, respectively, with an increase to 91.3% and 80.9% within the closest

**Table 10. Cross-validation of Measured vs. Predicted VO<sub>2peak</sub> from peak measurements, in women: The HUNT 3 fitness study.**

|                           | Validation sample            |                               |       |       |      |            | Cross-validation sample      |                               |       |       |      |            |
|---------------------------|------------------------------|-------------------------------|-------|-------|------|------------|------------------------------|-------------------------------|-------|-------|------|------------|
|                           | Measured VO <sub>2peak</sub> | Predicted VO <sub>2peak</sub> | CE    | % SEE | % TE | N (%)      | Measured VO <sub>2peak</sub> | Predicted VO <sub>2peak</sub> | CE    | % SEE | % TE | N (%)      |
| <b>Age (yr.)</b>          |                              |                               |       |       |      |            |                              |                               |       |       |      |            |
| <40                       | 41.2 ± 7.4                   | 41.5 ± 5.9                    | -0.27 | 10.9  | 10.9 | 337 (28.1) | 40.7 ± 7.4                   | 40.7 ± 6.1                    | 0.03  | 10.1  | 10.1 | 327 (28.0) |
| 40-60                     | 35.8 ± 6.8                   | 35.6 ± 5.0                    | 0.18  | 11.5  | 11.6 | 628 (52.4) | 35.5 ± 6.7                   | 35.6 ± 5.4                    | -0.16 | 11.2  | 12.2 | 621 (53.1) |
| >60                       | 29.0 ± 5.4                   | 29.2 ± 4.6                    | -0.23 | 13.3  | 13.6 | 233 (19.5) | 29.9 ± 5.4                   | 29.7 ± 4.2                    | 0.23  | 13.2  | 13.3 | 222 (18.9) |
| <b>VO<sub>2peak</sub></b> |                              |                               |       |       |      |            |                              |                               |       |       |      |            |
| <30                       | 26.2 ± 2.7                   | 28.8 ± 4.1                    | -2.60 | 8.8   | 16.8 | 279 (23.3) | 26.6 ± 2.8                   | 29.2 ± 4.0                    | -2.60 | 8.9   | 16.3 | 268 (22.9) |
| 30-40                     | 34.9 ± 2.9                   | 35.3 ± 4.0                    | -0.44 | 7.1   | 10.1 | 575 (48.0) | 34.8 ± 2.9                   | 35.2 ± 4.1                    | -0.37 | 7.0   | 10.2 | 579 (49.5) |
| >40                       | 45.7 ± 4.8                   | 43.0 ± 4.9                    | 2.73  | 8.2   | 10.9 | 344 (28.7) | 45.5 ± 4.7                   | 42.8 ± 5.3                    | 2.69  | 6.9   | 9.9  | 324 (27.6) |
| <b>Velocity</b>           |                              |                               |       |       |      |            |                              |                               |       |       |      |            |
| <7                        | 29.2 ± 4.8                   | 29.1 ± 3.6                    | 0.07  | 12.6  | 12.8 | 392 (32.7) | 29.4 ± 4.6                   | 29.2 ± 3.4                    | 0.22  | 12.1  | 12.3 | 365 (31.2) |
| 7-10                      | 38.2 ± 6.1                   | 38.2 ± 3.9                    | -0.02 | 11.4  | 11.4 | 725 (60.5) | 37.6 ± 5.7                   | 37.8 ± 4.0                    | -0.26 | 11.2  | 11.2 | 734 (62.6) |
| >10                       | 49.1 ± 5.7                   | 49.5 ± 3.0                    | -0.38 | 9.7   | 9.7  | 81 (6.8)   | 51.3 ± 4.8                   | 50.3 ± 3.5                    | 0.99  | 7.5   | 7.8  | 72 (6.2)   |
| <b>Total</b>              | 36.0 ± 7.9                   | 36.0 ± 6.7                    | -0.03 | 11.7  | 11.7 | 1198       | 35.9 ± 7.6                   | 35.9 ± 6.6                    | -0.04 | 11.2  | 11.2 | 1171       |

VO<sub>2peak</sub> were categorized into 3 groups from measured VO<sub>2peak</sub>; <30, 30–40, >40 (mL kg<sup>-1</sup> min<sup>-1</sup>) were cutoff values for women; velocity: treadmill velocity (km h<sup>-1</sup>).

doi:10.1371/journal.pone.0144873.t010

**Table 11. Cross-tabulation between measured and predicted VO<sub>2peak</sub> quintiles from peak performance for men and women.**

| Predicted VO <sub>2peak</sub> | Men                          |                |                |                |                |       | Women                        |                |                |                |                |       |
|-------------------------------|------------------------------|----------------|----------------|----------------|----------------|-------|------------------------------|----------------|----------------|----------------|----------------|-------|
|                               | Measured VO <sub>2peak</sub> |                |                |                |                |       | Measured VO <sub>2peak</sub> |                |                |                |                |       |
|                               | Q <sub>1</sub>               | Q <sub>2</sub> | Q <sub>3</sub> | Q <sub>4</sub> | Q <sub>5</sub> | Total | Q <sub>1</sub>               | Q <sub>2</sub> | Q <sub>3</sub> | Q <sub>4</sub> | Q <sub>5</sub> | Total |
| <b>Q<sub>1</sub></b>          | 259                          | 69             | 14             | 2              | 0              | 344   | 256                          | 63             | 10             | 1              | 0              | 330   |
|                               | 75.3%                        | 20.1%          | 4.1%           | 0.6%           | 0%             | 100%  | 77.6%                        | 19.1%          | 3.0%           | 0.3%           | 0%             | 100%  |
| <b>Q<sub>2</sub></b>          | 169                          | 232            | 108            | 30             | 3              | 542   | 158                          | 216            | 134            | 30             | 5              | 543   |
|                               | 31.2%                        | 42.8%          | 19.9%          | 5.5%           | 0.6%           | 100%  | 29.1%                        | 39.8%          | 24.7%          | 5.5%           | 0.9%           | 100%  |
| <b>Q<sub>3</sub></b>          | 19                           | 132            | 206            | 123            | 22             | 502   | 53                           | 152            | 208            | 127            | 29             | 569   |
|                               | 3.8%                         | 26.3%          | 41.0%          | 24.5%          | 4.4%           | 100%  | 9.3%                         | 26.7%          | 36.6%          | 22.3%          | 5.1%           | 100%  |
| <b>Q<sub>4</sub></b>          | 4                            | 18             | 110            | 221            | 108            | 461   | 6                            | 40             | 109            | 246            | 135            | 536   |
|                               | 0.9%                         | 3.9%           | 23.9%          | 47.9%          | 23.4%          | 100%  | 1.1%                         | 7.5%           | 20.3%          | 45.9%          | 25.2%          | 100%  |
| <b>Q<sub>5</sub></b>          | 0                            | 2              | 15             | 76             | 319            | 412   | 1                            | 2              | 13             | 70             | 305            | 391   |
|                               | 0%                           | 0.5%           | 3.6%           | 18.4%          | 77.4%          | 100%  | 0.3%                         | 0.5%           | 3.3%           | 17.9%          | 78.0%          | 100%  |
| <b>Total</b>                  | 451                          | 453            | 453            | 452            | 452            | 2261  | 474                          | 473            | 474            | 474            | 474            | 2369  |

Q<sub>1-5</sub>, quintile cut-off values for measured and predicted VO<sub>2peak</sub>. Men: <36.0, 36.0–41.5, 41.6–46.5, 46.6–52.0, >52.0 (measured quintiles); and <37.1, 37.1–41.6, 41.7–46.0, 46.1–51.3, >51.3 (predicted quintiles). Women: <29.1, 29.1–33.3, 33.4–37.3, 37.4–42.1, >42.1 (measured quintiles), and <30.5, 30.5–33.8, 33.9–37.1, 37.2–41.2, >41.2 (predicted quintiles). Kendall's Tau statistic: 0.74 for men and 0.70 for women. Cohen Kappa statistic: 0.45 in men and 0.41 in women.

doi:10.1371/journal.pone.0144873.t011

**Table 12. Multiple linear regression coefficients for predicting VO<sub>2peak</sub> (mL·kg<sup>-1</sup>·min<sup>-1</sup>) from submaximal measurements in total sample.**

|                             | Men     |                |                     | Women   |                |                     |
|-----------------------------|---------|----------------|---------------------|---------|----------------|---------------------|
|                             | β       | Standardized β | Pearson Correlation | β       | Standardized β | Pearson Correlation |
| Intercept                   | 35.25   |                |                     | 23.77   |                |                     |
| Inclination                 | 1.276   | 0.200          | 0.233               | 1.205   | 0.307          | 0.300               |
| Velocity                    | 6.402   | 0.662          | 0.612               | 6.051   | 0.606          | 0.612               |
| Weight                      | -0.196  | -0.240         | -0.346              | -0.160  | -0.228         | -0.410              |
| Fraction HR <sub>peak</sub> | -27.615 | -0.280         | -0.014              | -20.671 | -0.253         | -0.040              |
| R                           | 0.744   |                |                     | 0.746   |                |                     |
| R <sup>2</sup>              | 0.554   |                |                     | 0.557   |                |                     |
| SEE                         | 6.24    |                |                     | 5.17    |                |                     |

Fraction HR<sub>peak</sub>: fraction of peak heart rate; R: multiple regression coefficient; R<sup>2</sup>: coefficient of determination; SEE: standard error of estimate, Inclination (%), Velocity (km·h<sup>-1</sup>), Weight (kg).

doi:10.1371/journal.pone.0144873.t012

measured quintiles. A total of 59.0% and 72.5% of the men and women, in the highest predicted quintile, were correctly categorized into the highest measured quintile, respectively, increasing to 84.9% and 89.0% within one of the two highest quintiles (Table 18). The rank correlation between measured and predicted quintiles were 0.61 and 0.60 in men and women, respectively, while measure of agreement by Kappa statistic was 0.30 in men and 0.28 in women.

### Discussion

The exercise-based prediction models generated in this study accurately placed approximately 91% of the low- and high-fit participants within the correct or nearest quintile of measured VO<sub>2peak</sub>, and predicted VO<sub>2peak</sub> with fair precision using both the peak performance and sub-maximal models.

### Accuracy of the VO<sub>2peak</sub> prediction models

The peak performance models displayed accuracy (SEE) of 10.5% (R<sup>2</sup> = 0.75) and 11.5% (R<sup>2</sup> = 0.72), in men and women, respectively. This is better than some previous research reporting accuracy in the range 13.3–16.6% [14,24], and also less accurate or equal to that reported by yet others (4.5–11.4%) [10–13,15,18,25]. Better prediction accuracy in other models may partly be attributed their homogeneous fitness level in sample subjects [10,12,13,15,18] and/or narrow age range [10–12]. Validating other models using HUNT 3 data is difficult given the use of

**Table 13. Multiple linear regression analysis for predicting VO<sub>2peak</sub> from submaximal measurements on total sample: The HUNT 3 fitness study.**

|                                                            | Men  |                |                 |        |      |      | Women |                |                 |        |      |      |
|------------------------------------------------------------|------|----------------|-----------------|--------|------|------|-------|----------------|-----------------|--------|------|------|
|                                                            | R    | R <sup>2</sup> | ΔR <sup>2</sup> | p      | SEE  | %SEE | R     | R <sup>2</sup> | ΔR <sup>2</sup> | p      | SEE  | %SEE |
| Inclination                                                | 0.23 | 0.05           | —               | —      | 9.00 | 20.3 | 0.30  | 0.09           | —               | —      | 7.34 | 20.4 |
| Inclination, Velocity                                      | 0.63 | 0.40           | 0.35            | <0.001 | 7.16 | 16.2 | 0.66  | 0.43           | 0.34            | <0.001 | 5.81 | 16.2 |
| Inclination, Velocity, Weight                              | 0.68 | 0.46           | 0.06            | <0.001 | 6.77 | 15.3 | 0.70  | 0.49           | 0.06            | <0.001 | 5.48 | 15.2 |
| Inclination, Velocity, Weight, Fraction HR <sub>peak</sub> | 0.74 | 0.55           | 0.09            | <0.001 | 6.24 | 14.1 | 0.75  | 0.56           | 0.06            | <0.001 | 5.17 | 14.4 |

Fraction HR<sub>peak</sub>: fraction of peak heart rate; R: multiple regression coefficient; R<sup>2</sup>: coefficient of determination; SEE: standard error of estimate; p: level of significance, Inclination (%), Velocity (km·h<sup>-1</sup>), Weight (kg).

doi:10.1371/journal.pone.0144873.t013

**Table 14. Multiple linear regression analysis for predicting VO<sub>2peak</sub> from submaximal measurements in men and women from validation samples: The HUNT 3 fitness study.**

|                                                            | Validation sample men |                |                 |        |      |      | Validation sample women |                |                 |        |      |      |
|------------------------------------------------------------|-----------------------|----------------|-----------------|--------|------|------|-------------------------|----------------|-----------------|--------|------|------|
|                                                            | R                     | R <sup>2</sup> | ΔR <sup>2</sup> | p      | SEE  | %SEE | R                       | R <sup>2</sup> | ΔR <sup>2</sup> | p      | SEE  | %SEE |
| Inclination                                                | 0.25                  | 0.06           | —               | —      | 8.78 | 19.8 | 0.31                    | 0.10           | —               | —      | 7.33 | 20.4 |
| Inclination, Velocity                                      | 0.62                  | 0.38           | 0.32            | <0.001 | 7.13 | 16.1 | 0.66                    | 0.44           | 0.34            | <0.001 | 5.75 | 16.0 |
| Inclination, Velocity, Weight                              | 0.67                  | 0.45           | 0.07            | <0.001 | 6.75 | 15.2 | 0.71                    | 0.50           | 0.06            | <0.001 | 5.44 | 15.1 |
| Inclination, Velocity, Weight, Fraction HR <sub>peak</sub> | 0.73                  | 0.54           | 0.09            | <0.001 | 6.21 | 14.0 | 0.75                    | 0.56           | 0.06            | <0.001 | 5.21 | 14.5 |

Fraction HR<sub>peak</sub>: fraction of peak heart rate; R: multiple regression coefficient; R<sup>2</sup>: coefficient of determination; SEE: standard error of estimate; p: level of significance, Inclination (%), Velocity (km·h<sup>-1</sup>), Weight (kg).

doi:10.1371/journal.pone.0144873.t014

different independent variables, e.g. watts on cycle ergometer [13,18,25] or 20m-shuttle run [10–12]. Although the ACSM running model [20] used, similar to us, speed and gradient, it is developed from steady-state submaximal aerobic exercise, and can be used exclusively in predicting VO<sub>2</sub> during steady-state submaximal work. Hence, it will overestimate VO<sub>2</sub> for peak exercise since contribution from anaerobic metabolism is significant [20], which was confirmed in a previous validation study [24]. However, we were able to validate a model by Uth and colleagues [15] using heart rate ratio (HR<sub>peak</sub>/resting heart rate) as predictor variable for

**Table 15. Measured vs. Predicted VO<sub>2peak</sub>, from submaximal measurements, in the total sample: The HUNT 3 fitness study.**

|                           | Men                          |                               |       |       |      |            | Women                        |                               |       |       |      |            |
|---------------------------|------------------------------|-------------------------------|-------|-------|------|------------|------------------------------|-------------------------------|-------|-------|------|------------|
|                           | Measured VO <sub>2peak</sub> | Predicted VO <sub>2peak</sub> | CE    | % SEE | % TE | N (%)      | Measured VO <sub>2peak</sub> | Predicted VO <sub>2peak</sub> | CE    | % SEE | % TE | N (%)      |
| <b>Age (yr.)</b>          |                              |                               |       |       |      |            |                              |                               |       |       |      |            |
| <40                       | 50.8 ± 8.5                   | 47.8 ± 7.0                    | 3.22  | 11.4  | 13.4 | 291 (21.9) | 41.0 ± 7.4                   | 39.5 ± 5.4                    | 1.46  | 13.0  | 13.7 | 371 (27.1) |
| 40-60                     | 44.1 ± 8.1                   | 44.6 ± 6.2                    | -0.41 | 13.4  | 13.4 | 726 (54.5) | 35.6 ± 6.8                   | 36.3 ± 4.9                    | -0.58 | 14.0  | 14.1 | 717 (52.4) |
| >60                       | 37.3 ± 7.4                   | 40.2 ± 6.4                    | -2.88 | 15.1  | 17.2 | 315 (23.6) | 29.4 ± 5.4                   | 31.1 ± 5.0                    | -1.68 | 14.3  | 16.5 | 281 (20.5) |
| <b>VO<sub>2peak</sub></b> |                              |                               |       |       |      |            |                              |                               |       |       |      |            |
| <35(<30)                  | 31.2 ± 3.2                   | 37.0 ± 5.6                    | -5.82 | 9.4   | 25.8 | 218 (16.4) | 26.4 ± 2.8                   | 30.8 ± 4.9                    | -4.25 | 9.3   | 23.2 | 308 (22.5) |
| 35-50 (30-40)             | 42.8 ± 4.2                   | 43.5 ± 5.0                    | -0.79 | 8.8   | 11.3 | 749 (56.2) | 34.9 ± 2.9                   | 35.4 ± 4.2                    | -0.53 | 7.5   | 11.7 | 667 (48.7) |
| >50 (>40)                 | 56.0 ± 5.0                   | 50.7 ± 5.7                    | 5.34  | 7.7   | 13.2 | 366 (27.4) | 45.6 ± 4.8                   | 41.5 ± 4.1                    | 4.21  | 8.8   | 13.0 | 394 (28.8) |
| <b>Velocity</b>           |                              |                               |       |       |      |            |                              |                               |       |       |      |            |
| <5                        | 35.4 ± 6.5                   | 36.0 ± 5.0                    | -0.44 | 15.4  | 16.4 | 216 (16.2) | 31.0 ± 5.6                   | 31.5 ± 4.4                    | -0.49 | 15.0  | 15.5 | 535 (39.1) |
| 5-6                       | 43.9 ± 7.9                   | 44.2 ± 4.4                    | -0.35 | 14.2  | 14.2 | 911 (68.3) | 38.3 ± 6.9                   | 38.5 ± 4.1                    | -0.24 | 13.7  | 13.8 | 787 (57.5) |
| >6                        | 52.9 ± 8.0                   | 53.2 ± 5.6                    | -0.36 | 12.2  | 12.4 | 206 (15.5) | 46.7 ± 7.6                   | 47.6 ± 3.7                    | -0.91 | 14.9  | 14.9 | 47 (3.4)   |
| <b>Total</b>              | 44.3 ± 9.3                   | 44.4 ± 6.9                    | -0.14 | 14.1  | 14.1 | 1333       | 35.9 ± 7.8                   | 36.1 ± 5.8                    | -0.12 | 14.4  | 14.4 | 1369       |

VO<sub>2peak</sub> were categorized into 3 groups from measured VO<sub>2peak</sub>; <35, 35–50, >50 (mL kg<sup>-1</sup> min<sup>-1</sup>) and <30, 30–40, >40 (mL kg<sup>-1</sup> min<sup>-1</sup>) were cutoff values for men and women, respectively; velocity: treadmill velocity (km h<sup>-1</sup>).

doi:10.1371/journal.pone.0144873.t015

**Table 16. Cross-validation of Measured vs. Predicted VO<sub>2peak</sub>, from submaximal measurements in men: The HUNT 3 fitness study.**

|                           | Validation sample            |                               |       |       |      |            | Cross-validation sample      |                               |       |       |      |            |
|---------------------------|------------------------------|-------------------------------|-------|-------|------|------------|------------------------------|-------------------------------|-------|-------|------|------------|
|                           | Measured VO <sub>2peak</sub> | Predicted VO <sub>2peak</sub> | CE    | % SEE | % TE | N (%)      | Measured VO <sub>2peak</sub> | Predicted VO <sub>2peak</sub> | CE    | % SEE | % TE | N (%)      |
| <b>Age (yr.)</b>          |                              |                               |       |       |      |            |                              |                               |       |       |      |            |
| <40                       | 50.9 ± 8.2                   | 47.9 ± 6.7                    | 3.14  | 10.7  | 12.5 | 142 (21.6) | 50.7 ± 8.8                   | 47.5 ± 6.9                    | 3.44  | 12.4  | 14.0 | 150 (22.1) |
| 40-60                     | 43.9 ± 8.1                   | 44.9 ± 5.9                    | -1.03 | 14.0  | 14.0 | 362 (55.5) | 44.3 ± 8.1                   | 45.0 ± 5.9                    | -0.62 | 12.7  | 12.7 | 364 (53.5) |
| >60                       | 37.8 ± 7.1                   | 40.7 ± 6.5                    | -2.86 | 13.7  | 16.0 | 149 (22.9) | 36.9 ± 7.7                   | 40.2 ± 6.1                    | -2.97 | 16.4  | 18.6 | 166 (24.4) |
| <b>VO<sub>2peak</sub></b> |                              |                               |       |       |      |            |                              |                               |       |       |      |            |
| <35                       | 31.4 ± 3.1                   | 37.4 ± 5.4                    | -5.94 | 9.0   | 25.4 | 102 (15.6) | 31.0 ± 3.2                   | 37.2 ± 5.6                    | -6.32 | 9.9   | 27.2 | 116 (17.1) |
| 35-50                     | 42.8 ± 4.1                   | 43.8 ± 4.8                    | -0.93 | 8.9   | 11.4 | 374 (57.3) | 42.7 ± 4.3                   | 43.5 ± 4.7                    | -0.81 | 8.7   | 10.7 | 375 (55.1) |
| >50                       | 55.8 ± 5.1                   | 50.5 ± 5.6                    | 5.41  | 7.5   | 13.2 | 177 (27.1) | 56.2 ± 4.9                   | 50.4 ± 5.2                    | 5.69  | 7.9   | 13.4 | 189 (27.8) |
| <b>Velocity</b>           |                              |                               |       |       |      |            |                              |                               |       |       |      |            |
| <5                        | 36.0 ± 6.7                   | 37.1 ± 4.9                    | -0.86 | 14.4  | 16.3 | 97 (14.9)  | 34.9 ± 6.3                   | 36.2 ± 5.0                    | -1.14 | 15.5  | 16.7 | 119 (17.5) |
| 5-6                       | 43.8 ± 7.9                   | 44.2 ± 4.5                    | -0.37 | 14.0  | 14.0 | 456 (69.8) | 43.9 ± 7.9                   | 44.4 ± 4.1                    | -0.42 | 14.4  | 14.5 | 455 (66.9) |
| >6                        | 52.8 ± 8.0                   | 54.0 ± 5.6                    | -1.14 | 12.6  | 12.7 | 100 (15.3) | 52.9 ± 8.2                   | 53.9 ± 5.5                    | -1.01 | 11.9  | 12.1 | 106 (15.6) |
| <b>Total</b>              | 44.3 ± 9.1                   | 44.6 ± 6.7                    | -0.27 | 14.0  | 14.0 | 653        | 44.3 ± 9.5                   | 44.4 ± 6.7                    | -0.09 | 14.2  | 14.2 | 680        |

VO<sub>2peak</sub> were categorized into 3 groups from measured VO<sub>2peak</sub>: <35, 35–50, >50 (mL kg<sup>-1</sup> min<sup>-1</sup>) and <30, 30–40, >40 (mL kg<sup>-1</sup> min<sup>-1</sup>) were cutoff values for men and women, respectively; velocity: treadmill velocity (km h<sup>-1</sup>).

doi:10.1371/journal.pone.0144873.t016

VO<sub>2max</sub>. The Uth model, derived from 46 well-trained men, presented a SEE of 4.5%. This accuracy was considerably lower when validated using HUNT 3 data (18% and 19% SEE in men and women, respectively), which is supported by Esco and colleagues [14] who also observed a substantial reduction in accuracy (SEE of 16.6%), using 109 healthy men to validate the Uth model. This underscores the importance of similar gender, age and physical fitness between the subjects using the model and the subjects used in developing the model to assure best possible accuracy [2,19].

Submaximal VO<sub>2peak</sub> prediction models are generally outperformed on accuracy by models derived from peak workload [26], which is also the case in this study presenting accuracies (SEE) of 14.1% (R<sup>2</sup> = 0.55) and 14.4% (R<sup>2</sup> = 0.56), in men and women, respectively. Moreover, non-exercise based prediction models derived from HUNT 3 fitness data [27] yielded a somewhat better accuracy (12.8% and 14.3% in men and women, respectively) than the present submaximal models, while the present peak models had better accuracy. Previous research reported prediction error in the range 7.3–20.9% [2,16,28–36]. The bench-mark Åstrand-Ryhming nomogram [37] reported accuracy of approximately 10%, which was confirmed when validated by Cink & Thomas [38]. Both Åstrand and Cink observed minor differences between measured and predicted VO<sub>2peak</sub>. However, both used small groups of physically fit college students for their calculations. Validating the Åstrand-Ryhming nomogram using untrained sedentary subjects [39] showed a 26.5% systematic underestimation of VO<sub>2max</sub>. Several peak [13,18,25] and submaximal models [16,29–31,34,35] used cycle ergometer to measure

**Table 17. Cross-validation of Measured vs. Predicted VO<sub>2peak</sub> from submaximal measurements in women: The HUNT 3 fitness study.**

|                           | Validation sample            |                               |       |       |      |            | Cross-validation sample      |                               |       |       |      |            |
|---------------------------|------------------------------|-------------------------------|-------|-------|------|------------|------------------------------|-------------------------------|-------|-------|------|------------|
|                           | Measured VO <sub>2peak</sub> | Predicted VO <sub>2peak</sub> | CE    | % SEE | % TE | N (%)      | Measured VO <sub>2peak</sub> | Predicted VO <sub>2peak</sub> | CE    | % SEE | % TE | N (%)      |
| <b>Age (yr.)</b>          |                              |                               |       |       |      |            |                              |                               |       |       |      |            |
| <40                       | 41.1 ± 7.3                   | 39.5 ± 5.1                    | 1.68  | 13.1  | 14.0 | 187 (27.4) | 40.8 ± 7.5                   | 39.7 ± 5.5                    | 1.16  | 12.8  | 13.3 | 184 (26.8) |
| 40-60                     | 35.5 ± 6.7                   | 36.3 ± 4.9                    | -0.67 | 13.8  | 13.9 | 346 (50.6) | 35.8 ± 6.8                   | 36.4 ± 4.8                    | -0.48 | 14.3  | 14.4 | 371 (54.1) |
| >60                       | 29.3 ± 5.7                   | 30.7 ± 5.0                    | -1.37 | 15.1  | 17.0 | 150 (22.0) | 29.7 ± 5.1                   | 31.6 ± 5.0                    | -1.82 | 13.8  | 15.8 | 131 (19.1) |
| <b>VO<sub>2peak</sub></b> |                              |                               |       |       |      |            |                              |                               |       |       |      |            |
| <30)                      | 26.3 ± 2.8                   | 30.6 ± 4.9                    | -4.23 | 9.5   | 23.7 | 164 (24.0) | 26.5 ± 2.7                   | 31.1 ± 4.9                    | -4.41 | 8.9   | 22.9 | 144 (21.0) |
| 30-40                     | 34.9 ± 2.8                   | 35.4 ± 4.2                    | -0.43 | 7.3   | 11.5 | 320 (46.9) | 34.8 ± 2.9                   | 35.5 ± 4.1                    | -0.77 | 7.6   | 11.9 | 347 (50.6) |
| >40                       | 45.6 ± 4.8                   | 41.5 ± 4.0                    | 4.08  | 8.9   | 12.9 | 199 (29.1) | 45.6 ± 4.7                   | 41.6 ± 4.1                    | 4.24  | 8.7   | 13.0 | 195 (28.4) |
| <b>Velocity</b>           |                              |                               |       |       |      |            |                              |                               |       |       |      |            |
| <5                        | 30.8 ± 5.5                   | 31.4 ± 4.4                    | -0.56 | 15.3  | 16.0 | 273 (40.0) | 31.3 ± 5.7                   | 31.7 ± 4.2                    | -0.38 | 14.6  | 14.8 | 262 (38.2) |
| 5-6                       | 38.3 ± 6.7                   | 38.5 ± 4.2                    | -0.16 | 13.6  | 13.8 | 386 (56.5) | 38.3 ± 7.0                   | 38.7 ± 3.9                    | -0.39 | 13.7  | 13.8 | 401 (58.4) |
| >6                        | 47.1 ± 7.9                   | 47.0 ± 4.1                    | 0.19  | 13.5  | 14.2 | 24 (3.5)   | 46.3 ± 7.4                   | 48.5 ± 3.2                    | -2.10 | 15.4  | 15.6 | 23 (3.4)   |
| <b>Total</b>              | 35.9 ± 7.8                   | 36.0 ± 5.9                    | -0.03 | 14.5  | 14.5 | 683        | 36.1 ± 7.7                   | 36.3 ± 5.7                    | -0.11 | 14.2  | 14.3 | 686        |

VO<sub>2peak</sub> were categorized into 3 groups from measured VO<sub>2peak</sub>; <35, 35–50, >50 (mL kg<sup>-1</sup> min<sup>-1</sup>) and <30, 30–40, >40 (mL kg<sup>-1</sup> min<sup>-1</sup>) were cutoff values for men and women, respectively; velocity: treadmill velocity (km h<sup>-1</sup>).

doi:10.1371/journal.pone.0144873.t017

VO<sub>2peak/max</sub>, however, compelling evidence points to a 6–15% lower VO<sub>2peak</sub> compared to that obtained when running [40–44].

### Cross-validation of VO<sub>2peak</sub> prediction models

Randomly splitting data into validation and cross-validation samples established good stability throughout all models, suggesting minor shrinkage in accuracy if used on other similar populations. Moreover, data splitting will minimize potential over fitting that might deteriorate the external validity of the models [45].

For the peak performance models, error estimates are fairly stable across subgroups of both age and treadmill velocity. Conversely, in the VO<sub>2peak</sub> subgroups we observed a trend of systematic under- and overestimation of the predicted values in the high- and low-fit participants, respectively. This is consistent with previous findings [12,46,47].

Similarly for the submaximal models, error estimates are reasonably stable across the treadmill velocity subgroups, whereas across the age subgroups there is a tendency towards under- and overestimating VO<sub>2peak</sub> in the youngest and oldest, respectively. For the VO<sub>2peak</sub> subgroups an even greater tendency towards under- and over estimation in the high- and low-fit participants, respectively, is observed compared to the peak performance models. Wier and colleagues [26] argue that the underestimation of the fittest participants is of less importance from a public health perspective, since a high level of fitness is not associated with adverse health outcomes. However, it highlights the necessity of using models derived from aerobically

**Table 18. Cross-tabulation between measured and predicted VO<sub>2peak</sub> quintiles from submaximal performance in men and women.**

| Predicted<br>VO <sub>2peak</sub> | Men                          |                |                |                |                |       | Women                        |                |                |                |                |       |
|----------------------------------|------------------------------|----------------|----------------|----------------|----------------|-------|------------------------------|----------------|----------------|----------------|----------------|-------|
|                                  | Measured VO <sub>2peak</sub> |                |                |                |                | Total | Measured VO <sub>2peak</sub> |                |                |                |                | Total |
|                                  | Q <sub>1</sub>               | Q <sub>2</sub> | Q <sub>3</sub> | Q <sub>4</sub> | Q <sub>5</sub> |       | Q <sub>1</sub>               | Q <sub>2</sub> | Q <sub>3</sub> | Q <sub>4</sub> | Q <sub>5</sub> |       |
| <b>Q<sub>1</sub></b>             | 127                          | 60             | 16             | 2              | 0              | 205   | 171                          | 104            | 49             | 15             | 1              | 340   |
|                                  | 62.0%                        | 29.3%          | 7.8%           | 1.0%           | 0%             | 100%  | 50.3%                        | 30.6%          | 14.4%          | 4.4%           | 0.3%           | 100%  |
| <b>Q<sub>2</sub></b>             | 71                           | 74             | 48             | 23             | 5              | 221   | 63                           | 102            | 88             | 48             | 11             | 312   |
|                                  | 32.1%                        | 33.5%          | 21.7%          | 10.4%          | 2.3%           | 100%  | 20.2%                        | 32.7%          | 28.2%          | 15.4%          | 3.5%           | 100%  |
| <b>Q<sub>3</sub></b>             | 39                           | 81             | 75             | 61             | 11             | 267   | 23                           | 52             | 79             | 97             | 38             | 289   |
|                                  | 14.6%                        | 30.3%          | 28.1%          | 22.8%          | 4.1%           | 100%  | 8.0%                         | 18.0%          | 27.3%          | 33.6%          | 13.1%          | 100%  |
| <b>Q<sub>4</sub></b>             | 18                           | 44             | 84             | 111            | 51             | 308   | 6                            | 16             | 38             | 82             | 86             | 228   |
|                                  | 5.8%                         | 14.3%          | 27.3%          | 36.0%          | 16.6%          | 100%  | 2.6%                         | 7.0%           | 16.7%          | 36.0%          | 37.7%          | 100%  |
| <b>Q<sub>5</sub></b>             | 3                            | 13             | 34             | 86             | 196            | 332   | 1                            | 5              | 16             | 33             | 145            | 200   |
|                                  | 0.9%                         | 3.9%           | 10.2%          | 25.6%          | 59.0%          | 100%  | 0.5%                         | 2.5%           | 8.0%           | 16.5%          | 72.5%          | 100%  |
| <b>Total</b>                     | 258                          | 272            | 257            | 283            | 263            | 1333  | 264                          | 279            | 270            | 275            | 281            | 1369  |

Q<sub>1-5</sub>, quintiles cut-off values of measured and predicted VO<sub>2peak</sub>. Men: <36.0, 36.0–41.5, 41.6–46.5, 46.6–52.0, >52.0 (measured quintiles); and <39.0, 39.0–42.9, 43.0–46.0, 46.1–49.5, >49.5 (predicted quintiles). Women: <29.1, 29.1–33.3, 33.4–37.3, 37.4–42.1, >42.1 (measured quintiles), and <31.4, 31.4–34.8, 34.9–37.5, 37.6–40.7, >40.7 (predicted quintiles). Kendall Tau statistic: 0.61 for men and 0.60 for women. Cohen Kappa statistics: 0.30 for men and 0.28 for women.

doi:10.1371/journal.pone.0144873.t018

fit subjects to obtain high predictive accuracy and stability for a well-trained population. Such models are previously developed [12,15,18], while models with high predictive accuracy for low-fit populations are scarce. The models inability to accurately identify fitness level in the low-fit subjects represent a potential concern, since low aerobic fitness is associated with increased prevalence of chronic disease as well as a higher mortality risk, e.g. cardiovascular disease and metabolic syndrome [3,4,48]. However, cross-classification accurately predicted approximately 91% of participants, in both sexes, within the nearest quintile of measured VO<sub>2peak</sub>.

There are several factors that might contribute to the systematic over- and underestimation of VO<sub>2peak</sub>, as well as to the attenuation of prediction accuracy. The statistical rationale is that our models are based on linear regression, where the distribution assumptions smooth out extreme observations compared to the grand mean, and may therefore under predict high observations and conversely over predict low observations (regression-to-the-mean phenomenon).

For the submaximal performance models there are additional plausible factors. Genetics account for an additional source of prediction inaccuracy as maximal heart rate is heterogeneous, with significant variations in a population [1]. Based on HUNT 3 fitness data, our group recently reported a standard deviation on measured maximal heart rate of ±14 beats·min<sup>-1</sup> [23]. Consequently, imbedding fraction of maximal/peak heart rate as a separate equation in the model weakens the accuracy of the VO<sub>2peak</sub> prediction [1]. Furthermore, since the models are based on linear predictions the best trained are underestimated, and could be so because they have a good movement economy, conversely an overestimation of the least fit, attributed poor movement economy. These additional possible explanations are supported by the considerably higher over- and under estimation of VO<sub>2peak</sub> in the submaximal performance models compared to the peak performance models. Moreover if a person using the prediction



equation has a better movement economy than that of the subjects in the HUNT 3 fitness study, he or she will be overestimated using the submaximal model, and conversely underestimated with poor movement economy. The person will have a better or worse aerobic capacity, influenced by movement economy, not by VO<sub>2peak</sub>.

### The independent variables influence on VO<sub>2peak</sub>

Calculating standardized  $\beta$  weights, for the models based on peak performance, revealed velocity as the key determinant of VO<sub>2peak</sub>, followed by age and weight, among both sexes. Not surprisingly inclination had the least impact on VO<sub>2peak</sub> since approximately 87% of the subjects tested on 10% treadmill inclination in the peak performance models.

Likewise for the submaximal models velocity was paramount in determining VO<sub>2peak</sub> among both sexes. In men importance of succeeding determinants of VO<sub>2peak</sub> were fraction HR<sub>peak</sub> (consisting of age and work heart rate), weight and inclination. For women this was altered to inclination, fraction of HR<sub>peak</sub> and weight. Inclination being more potent in women may be related to a larger diversity in running inclination. Explained variances in the submaximal models were 55% and 56% in men and women, respectively, which yields better predictive capabilities than some (31–51%) [17,31,34], and yet worse than other previous models (60–83%) [2,16,28,29,32,33,35].

### Strengths and Limitations

The large sample size, including both men and women, and wide age range makes this study robust. Our direct test to volitional exhaustion to measure VO<sub>2peak</sub> by ventilatory gas analysis is preferable compared to indirect estimates when making prediction equations from population studies, since direct measurements display higher correlations as well as lower standard error of estimate [5]. The low participation rate may contribute to bias caused by self-selection. Still, 5633 (45%) of those invited to the present Fitness study from the total HUNT population volunteered for the cardiopulmonary exercise test. Out of these 5633, 1003 candidates withdrew, did not complete the CPET or were excluded for medical reasons, leaving 4631 (37%) completed tests. Some potential candidates declined participation due to long waiting lines caused by limited capacity at test sites. Consequently, it is possible that those who finally partook could be healthier than those who withdrew from testing. However, comparing the Fitness study participants to a healthy sample from the total HUNT population (i.e. free from pulmonary- and cardiovascular diseases, sarcoidosis or cancer) established that there were no considerable differences between the two [3]. However, the consistent overestimation of the least fit candidates associated with the highest health risks is more precarious. This should be taken into account when applying the models.

The models inability to accurately identify fitness level in the low-fit subjects represent a potential concern, since low aerobic fitness is associated with increased prevalence of chronic disease as well as a higher mortality risk, e.g. cardiovascular disease and metabolic syndrome

### Practical implications

In a health care setting the models good ability to detect subjects with low VO<sub>2peak</sub> is paramount to classify persons in need of physical activity and lifestyle intervention. Cross-classification of participants into quintiles of measured and predicted VO<sub>2peak</sub> demonstrate the models reasonable ability to classify participants appropriately. More importantly, both the use of peak- and submaximal performance models are considered a generally safe practice on high-risk cardiovascular disease patients [49]. Our models are derived from a large population

of both men and women, with a wide heterogeneity in fitness levels as well as covering a large age span (20–90 years). This provides a high degree of applicability for widespread use.

## Conclusions

The VO<sub>2peak</sub> prediction models presented in this study are inexpensive and uncomplicated to utilize, thus a convenient option for both recreational athletes as well as in health care settings. Judicious and appropriate use of these predictive models will offer valuable information in providing a fairly accurate estimate of peak oxygen uptake, which is beneficial for establishing cardiorespiratory fitness, and with potentially improved risk stratification.

## Acknowledgments

The HUNT 3 fitness study is a collaboration between The HUNT research center (Faculty of Medicine, Norwegian University of Science and Technology, NTNU), Nord-Trøndelag County Council and The Norwegian Institute of public Health, Liaison Committee between the Central Norway Regional Health Authority (RHA) and the Norwegian University of Science and Technology (NTNU).

## Author Contributions

Conceived and designed the experiments: UW. Performed the experiments: UW BMN. Analyzed the data: HL BMN UW. Contributed reagents/materials/analysis tools: HL BMN UW. Wrote the paper: HL BMN UW. Drafting of manuscript or revising it critically for important intellectual content: HL BMN UW. Final approval of the version to be published: HL BMN UW.

## References

1. Evans HJ, Ferrar KE, Smith AE, Parfitt G, Eston RG (2015) A systematic review of methods to predict maximal oxygen uptake from submaximal, open circuit spirometry in healthy adults. *J Sci Med Sport* 18: 183–188. doi: [10.1016/j.jsams.2014.03.006](https://doi.org/10.1016/j.jsams.2014.03.006) PMID: [24721146](https://pubmed.ncbi.nlm.nih.gov/24721146/)
2. Larsen GE, George JD, Alexander JL, Fellingham GW, Aldana SG, Parcell AC (2002) Prediction of maximum oxygen consumption from walking, jogging, or running. *Res Q Exerc Sport* 73: 66–72. PMID: [11926486](https://pubmed.ncbi.nlm.nih.gov/11926486/)
3. Aspenes ST, Nilsen TI, Skaug EA, Bertheussen GF, Ellingsen O, Vatten L, et al. (2011) Peak oxygen uptake and cardiovascular risk factors in 4631 healthy women and men. *Med Sci Sports Exerc* 43: 1465–1473. doi: [10.1249/MSS.0b013e31820ca81c](https://doi.org/10.1249/MSS.0b013e31820ca81c) PMID: [21228724](https://pubmed.ncbi.nlm.nih.gov/21228724/)
4. Kodama S, Saito K, Tanaka S, Maki M, Yachi Y, Asumi M, et al. (2009) Cardiorespiratory fitness as a quantitative predictor of all-cause mortality and cardiovascular events in healthy men and women: a meta-analysis. *JAMA* 301: 2024–2035. doi: [10.1001/jama.2009.681](https://doi.org/10.1001/jama.2009.681) PMID: [19454641](https://pubmed.ncbi.nlm.nih.gov/19454641/)
5. Jurca R, Jackson AS, LaMonte MJ, Morrow JR Jr., Blair SN, Wareham NJ, et al. (2005) Assessing cardiorespiratory fitness without performing exercise testing. *Am J Prev Med* 29: 185–193.
6. Guazzi M, Adams V, Conraads V, Halle M, Mezzani A, Vanhees L, et al. (2012) EACPR/AHA Scientific Statement. Clinical recommendations for cardiopulmonary exercise testing data assessment in specific patient populations. *Circulation* 126: 2261–2274. doi: [10.1161/CIR.0b013e31826fb946](https://doi.org/10.1161/CIR.0b013e31826fb946) PMID: [22952317](https://pubmed.ncbi.nlm.nih.gov/22952317/)
7. Gupta S, Rohatgi A, Ayers CR, Willis BL, Haskell WL, Khera A, et al. (2011) Cardiorespiratory fitness and classification of risk of cardiovascular disease mortality. *Circulation* 123: 1377–1383. doi: [10.1161/CIRCULATIONAHA.110.003236](https://doi.org/10.1161/CIRCULATIONAHA.110.003236) PMID: [21422392](https://pubmed.ncbi.nlm.nih.gov/21422392/)
8. Stamatakis E, Hamer M, O'Donovan G, Batty GD, Kivimaki M (2013) A non-exercise testing method for estimating cardiorespiratory fitness: associations with all-cause and cardiovascular mortality in a pooled analysis of eight population-based cohorts. *Eur Heart J* 34: 750–758. doi: [10.1093/eurheartj/ehs097](https://doi.org/10.1093/eurheartj/ehs097) PMID: [22555215](https://pubmed.ncbi.nlm.nih.gov/22555215/)
9. (1997) Clinical exercise testing with reference to lung diseases: indications, standardization and interpretation strategies. ERS Task Force on Standardization of Clinical Exercise Testing. *European Respiratory Society. Eur Respir J* 10: 2662–2689. PMID: [9426113](https://pubmed.ncbi.nlm.nih.gov/9426113/)

10. Tsiaras V, Zafeiridis A, Dipla K, Patras K, Georgoulis A, Kellis S, et al. (2010) Prediction of peak oxygen uptake from a maximal treadmill test in 12- to 18-year-old active male adolescents. *Pediatr Exerc Sci* 22: 624–637. PMID: [21242610](#)
11. Leger LA, Lambert J (1982) A maximal multistage 20-m shuttle run test to predict VO<sub>2</sub> max. *Eur J Appl Physiol Occup Physiol* 49: 1–12. PMID: [7201922](#)
12. Kilding AE, Aziz AR, Teh KC (2006) Measuring and predicting maximal aerobic power in international-level intermittent sport athletes. *J Sports Med Phys Fitness* 46: 366–372. PMID: [16998439](#)
13. Lamberts RP, Davidowitz KJ (2014) Allometric scaling and predicting cycling performance in (well-) trained female cyclists. *Int J Sports Med* 35: 217–222. doi: [10.1055/s-0033-1349139](#) PMID: [23900902](#)
14. Esco MR, Olson MS, Williford HN, Mugu EM, Bloomquist BE, McHugh AN (2012) Crossvalidation of two heart rate-based equations for predicting VO<sub>2</sub>max in white and black men. *J Strength Cond Res* 26: 1920–1927. doi: [10.1519/JSC.0b013e318238e863](#) PMID: [21964424](#)
15. Uth N, Sorensen H, Overgaard K, Pedersen PK (2004) Estimation of VO<sub>2</sub>max from the ratio between HR<sub>max</sub> and HR<sub>rest</sub>—the Heart Rate Ratio Method. *Eur J Appl Physiol* 91: 111–115. PMID: [14624296](#)
16. Cao ZB, Miyatake N, Higuchi M, Miyachi M, Ishikawa-Takata K, Tabata I (2010) Predicting VO<sub>2</sub>max with an objectively measured physical activity in Japanese women. *Med Sci Sports Exerc* 42: 179–186. doi: [10.1249/MSS.0b013e3181af238d](#) PMID: [20010115](#)
17. Kendall KL, Fukuda DH, Smith AE, Cramer JT, Stout JR (2012) Predicting maximal aerobic capacity (VO<sub>2</sub>max) from the critical velocity test in female collegiate rowers. *J Strength Cond Res* 26: 733–738. doi: [10.1519/JSC.0b013e318225f3ac](#) PMID: [22289694](#)
18. Malek MH, Berger DE, Housh TJ, Coburn JW, Beck TW (2004) Validity of VO<sub>2</sub>max equations for aerobically trained males and females. *Med Sci Sports Exerc* 36: 1427–1432. PMID: [15292753](#)
19. Malek MH, Housh TJ, Berger DE, Coburn JW, Beck TW (2005) A new non-exercise-based Vo<sub>2</sub>max prediction equation for aerobically trained men. *J Strength Cond Res* 19: 559–565. PMID: [16095416](#)
20. Armstrong LB, Balady GJ, Berry MJ, Davis SE, Davy BM, Davy KP, et al. (2006) ACSM's Guidelines for Exercise Testing and Prescription. U.S.: Lippincott Williams & Wilkins. 288 p.
21. Rotstein A, Inbar O, Berginsky T, Meckel Y (2005) Preferred transition speed between walking and running: effects of training status. *Med Sci Sports Exerc* 37: 1864–1870. PMID: [16286854](#)
22. Turvey MT, Holt KG, Lafiandra ME, Fonseca ST (1999) Can the transitions to and from running and the metabolic cost of running be determined from the kinetic energy of running? *J Mot Behav* 31: 265–278.
23. Loe H, Rognmo O, Saltin B, Wisloff U (2013) Aerobic capacity reference data in 3816 healthy men and women 20–90 years. *PLoS One* 8: e64319. doi: [10.1371/journal.pone.0064319](#) PMID: [23691196](#)
24. Koutlianos N, Dimitros E, Metaxas T, Cansiz M, Deligiannis A, Kouidi E (2013) Indirect estimation of VO<sub>2</sub>max in athletes by ACSM's equation: valid or not? *Hippokratia* 17: 136–140. PMID: [24376318](#)
25. Magrani P, Pompeu FA (2010) [Equations for predicting aerobic power (VO<sub>2</sub>) of young Brazilian adults]. *Arq Bras Cardiol* 94: 763–770. PMID: [20499007](#)
26. Wier LT, Jackson AS, Ayers GW, Arenare B (2006) Nonexercise models for estimating VO<sub>2</sub>max with waist girth, percent fat, or BMI. *Med Sci Sports Exerc* 38: 555–561. PMID: [16540845](#)
27. Nes BM, Janszky I, Vatten LJ, Nilsen TI, Aspenes ST, Wisloff U (2011) Estimating V.O<sub>2peak</sub> from a nonexercise prediction model: the HUNT Study, Norway. *Med Sci Sports Exerc* 43: 2024–2030. doi: [10.1249/MSS.0b013e31821d336f](#) PMID: [21502897](#)
28. Billinger SA, VAN.S E, McClain M, Lentz AA, Good MB (2012) Recumbent stepper submaximal exercise test to predict peak oxygen uptake. *Med Sci Sports Exerc* 44: 1539–1544. doi: [10.1249/MSS.0b013e31824f5be4](#) PMID: [22382170](#)
29. Coquart JB, Eston RG, Grosbois JM, Lemaire C, Dubart AE, Luttenbacher DP, et al. (2010) Prediction of peak oxygen uptake from age and power output at RPE 15 in obese women. *Eur J Appl Physiol* 110: 645–649. doi: [10.1007/s00421-010-1524-5](#) PMID: [20532554](#)
30. Cao ZB, Miyatake N, Aoyama T, Higuchi M, Tabata I (2013) Prediction of maximal oxygen uptake from a 3-minute walk based on gender, age, and body composition. *J Phys Act Health* 10: 280–287. PMID: [22821953](#)
31. Cao ZB, Miyatake N, Higuchi M, Ishikawa-Takata K, Miyachi M, Tabata I (2009) Prediction of VO<sub>2</sub>max with daily step counts for Japanese adult women. *Eur J Appl Physiol* 105: 289–296. doi: [10.1007/s00421-008-0902-8](#) PMID: [18985375](#)
32. Swain DP, Wright RL (1997) Prediction of VO<sub>2peak</sub> from submaximal cycle ergometry using 50 versus 80 rpm. *Med Sci Sports Exerc* 29: 268–272. PMID: [9044233](#)
33. Oja P, Laukkanen R, Pasanen M, Tyry T, Vuori I (1991) A 2-km walking test for assessing the cardiorespiratory fitness of healthy adults. *Int J Sports Med* 12: 356–362. PMID: [1917218](#)

34. Faulkner J, Parfitt G, Eston R (2007) Prediction of maximal oxygen uptake from the ratings of perceived exertion and heart rate during a perceptually-regulated sub-maximal exercise test in active and sedentary participants. *Eur J Appl Physiol* 101: 397–407. PMID: [17684757](#)
35. Okura T, Tanaka K (2001) A unique method for predicting cardiorespiratory fitness using rating of perceived exertion. *J Physiol Anthropol Appl Human Sci* 20: 255–261. PMID: [11759263](#)
36. Marsh CE (2012) Evaluation of the American College of Sports Medicine submaximal treadmill running test for predicting VO<sub>2max</sub>. *J Strength Cond Res* 26: 548–554. doi: [10.1519/JSC.0b013e3181bac56e](#) PMID: [22262016](#)
37. Astrand PO, Ryhming I (1954) A nomogram for calculation of aerobic capacity (physical fitness) from pulse rate during sub-maximal work. *J Appl Physiol* 7: 218–221. PMID: [13211501](#)
38. Cink RE, Thomas TR (1981) Validity of the Astrand-Ryhming nomogram for predicting maximal oxygen intake. *Br J Sports Med* 15: 182–185. PMID: [7272663](#)
39. Rowell LB, Taylor HL, Wang Y (1964) Limitations to Prediction of Maximal Oxygen Intake. *J Appl Physiol* 19: 919–927. PMID: [14207745](#)
40. Astrand PO, Rodahl K, Dahl HA, Strømme SB (2003) *Textbook of Work Physiology. Physiological Bases of Exercise*. Champaign, IL, U.S.: Human Kinetics. 273p.
41. Hermansen L, Saltin B (1969) Oxygen uptake during maximal treadmill and bicycle exercise. *J Appl Physiol* 26: 31–37. PMID: [5762873](#)
42. Miles DS, Critz JB, Knowlton RG (1980) Cardiovascular, metabolic, and ventilatory responses of women to equivalent cycle ergometer and treadmill exercise. *Med Sci Sports Exerc* 12: 14–19. PMID: [7392896](#)
43. Faulkner JA, Roberts DE, Elk RL, Conway J (1971) Cardiovascular responses to submaximum and maximum effort cycling and running. *J Appl Physiol* 30: 457–461. PMID: [5572760](#)
44. Miyamura M, Honda Y (1972) Oxygen intake and cardiac output during maximal treadmill and bicycle exercise. *J Appl Physiol* 32: 185–188.
45. Rosner B (2006) *Fundamentals of Biostatistics*. Belmont, CA, U.S.: Thomson. 868 p.
46. Heil DP, Freedson PS, Ahlquist LE, Price J, Rippe JM (1995) Nonexercise regression models to estimate peak oxygen consumption. *Med Sci Sports Exerc* 27: 599–606. PMID: [7791593](#)
47. Jackson AS, Blair SN, Mahar MT, Wier LT, Ross RM, Stuteville JE (1990) Prediction of functional aerobic capacity without exercise testing. *Med Sci Sports Exerc* 22: 863–870. PMID: [2287267](#)
48. Myers J, Prakash M, Froelicher V, Do D, Partington S, Atwood JE (2002) Exercise capacity and mortality among men referred for exercise testing. *N Engl J Med* 346: 793–801. PMID: [11893790](#)
49. Skalski J, Allison TG, Miller TD (2012) The safety of cardiopulmonary exercise testing in a population with high-risk cardiovascular diseases. *Circulation* 126: 2465–2472. doi: [10.1161/CIRCULATIONAHA.112.110460](#) PMID: [23091065](#)
